# Supplementary material for: The utility of routine surveillance screening with magnetic resonance imaging (MRI) to detect tumour recurrence in children with low-grade central nervous system (CNS) tumours: a systematic review
Source: Springer Nature journal article supplement (doi:10.1007/s11060-018-2901-x), 2018-06-09
Supplement: MOESM3 [file 15833800]

### Online Resource 3: Data extraction and quality assessment proforma

|                                                                                    |  |
|------------------------------------------------------------------------------------|--|
| <b>Study demographics</b>                                                          |  |
| Study Name / ID:                                                                   |  |
| Investigator group/study name:                                                     |  |
| Hospital and country conducted:                                                    |  |
| Single or multi-institutional study:                                               |  |
| Study title:                                                                       |  |
| Study objectives:                                                                  |  |
| Publication status of paper:                                                       |  |
| Is the study linked to other papers? (state):                                      |  |
| Study design:                                                                      |  |
| Years of study:                                                                    |  |
| Overall trial N:                                                                   |  |
| <b>Population / Study eligibility</b>                                              |  |
| General tumour type(s):                                                            |  |
| Tumour subtype(s) (N) :                                                            |  |
| Tumour location:                                                                   |  |
| Tumour grade:                                                                      |  |
| Age: (median, range: mean; SD):                                                    |  |
| Male: Female N (%)                                                                 |  |
| Inclusion criteria:                                                                |  |
| Exclusion criteria:                                                                |  |
| <b>Baseline data</b>                                                               |  |
| Previous treatments:                                                               |  |
| Response after previous treatments:                                                |  |
| In the case of surgery, extent of resection:                                       |  |
| Imaging modality used to determine post-operative status:                          |  |
| <b>Intervention(s)</b>                                                             |  |
| Intervention:                                                                      |  |
| MRI protocol and planning (including plane(s), weighting and contrast enhancement) |  |
| Treatment intent (curative or palliative)                                          |  |
| Concomitant therapy:                                                               |  |
| <b>Outcome definitions:-</b>                                                       |  |
| Post-operative MRI scan:                                                           |  |
| Surveillance MRI scan:                                                             |  |
| Symptomatic:                                                                       |  |
| Asymptomatic:                                                                      |  |
| Definition of (radiographic) recurrence / progression:                             |  |
| Overall survival (OS):                                                             |  |
| Event-free survival (EFS):                                                         |  |
| Recurrence-free survival (RFS):                                                    |  |
| Progression-free survival (PFS):                                                   |  |
| Measurement of tumour response:                                                    |  |
| Short-term adverse events (toxicity)                                               |  |
| Long-term adverse events                                                           |  |
| <b>Results</b>                                                                     |  |
| N in analysis:                                                                     |  |

|                                                                |  |
|----------------------------------------------------------------|--|
| Average duration of follow-up (range):                         |  |
| Average frequency of MRI surveillance imaging (range):         |  |
| Average number of surveillance MRI images per patient (range): |  |
| Patients with Recurrent disease (n):                           |  |
| Average age at recurrence (range):                             |  |
| Average time-to-recurrence / progression (range):              |  |
| Frequency of MRI-detected recurrence / detection rate:         |  |
| Changes in patient treatment due to recurrence:                |  |
| Median survival:                                               |  |
| Overall survival (OS):                                         |  |
| Event-free survival (EFS):                                     |  |
| Recurrence-free survival (RFS):                                |  |
| Progression-free survival (PFS):                               |  |
| Tumour response rates:                                         |  |
| Short-term adverse events (toxicity)                           |  |
| Long-term adverse events                                       |  |
| Quality of survival:                                           |  |
| Measures of family psychological functioning and anxiety:      |  |
| <b>Analysis</b>                                                |  |
| Methods of analysis (ITT or per protocol):                     |  |
| Statistical tests used (state; comment)                        |  |
| <b>Conclusions</b>                                             |  |
| Authors conclusions:                                           |  |
| Reviewers conclusions:                                         |  |

| <b>Study Quality Assessment</b> |                                                                                                                                     | <b>Y/N</b> |
|---------------------------------|-------------------------------------------------------------------------------------------------------------------------------------|------------|
| 1.                              | Is the study based on a representative sample selected from the relevant population?                                                |            |
| 2.                              | Are the criteria for inclusion explicit?                                                                                            |            |
| 3.                              | Were all individuals who entered the study, at a similar timepoint in their disease progression?                                    |            |
| 4.                              | Was follow-up long enough for important outcomes to occur?                                                                          |            |
| 5.                              | Were outcomes assessed using objective criteria or was blinding used?                                                               |            |
| 6.                              | If comparisons of sub-series are being made, was there sufficient description of the series and distribution of prognostic factors? |            |
| Reviewer comments:              |                                                                                                                                     |            |

**The utility of routine surveillance screening with magnetic resonance imaging (MRI) to detect tumour recurrence in children with low grade central nervous system (CNS) tumours: a systematic review**

**Journal of Neuro-oncology**

Simon P. Stevens,<sup>1</sup> Caroline Main,<sup>1</sup> Simon Bailey,<sup>2</sup> Barry Pizer,<sup>3</sup> Martin English,<sup>5</sup> Robert Phillips,<sup>6</sup> Andrew Peet,<sup>4</sup> Shivaram Avula,<sup>3</sup> Sophie Wilne,<sup>7</sup> Keith Wheatley,<sup>1</sup> Pamela R. Kearns,<sup>1,5</sup> Jayne S. Wilson<sup>1</sup>

<sup>1</sup> Cancer Research UK Clinical Trials Unit (CRCTU), Institute of Cancer and Genomic Sciences, University of Birmingham, UK

<sup>2</sup> Sir James Spence Institute of Child Health, Royal Victoria Infirmary, Newcastle-Upon-Tyne

<sup>3</sup> Alder Hey Children's NHS Foundation Trust, Liverpool, UK

<sup>4</sup> Institute of Cancer and Genomic Sciences, University of Birmingham, UK

<sup>5</sup> Birmingham Women and Children's Hospital NHS Foundation Trust, Birmingham, UK

<sup>6</sup> Centre for Reviews and Dissemination (CRD), University of York, UK

<sup>7</sup> Queen's Medical Centre, Nottingham University Hospitals' NHS Trust, Nottingham, UK

**Correspondence:**

Jayne Wilson

UK; Tel: +441214149273

Email: j.s.wilson.1@bham.ac.uk
