# Supplementary material for: The utility of routine surveillance screening with magnetic resonance imaging (MRI) to detect tumour recurrence in children with low-grade central nervous system (CNS) tumours: a systematic review
Source: Springer Nature journal article supplement (doi:10.1007/s11060-018-2901-x), 2018-06-09
Supplement: MOESM4 [file 15833800]

**Online Resource 4: Definitions of extent of resection and recurrence/progression provided by study authors**

|                                  | <b>ALFORD<br/>ET AL [13]</b> | <b>DODGSHUN<br/>ET AL [14]</b>                                                                                                   | <b>DORWARD<br/>ET AL [15]</b>                                                                               | <b>KIM<br/>ET AL [16]</b>                                                                                                                                                            | <b>UDAKA<br/>ET AL [17]</b>                                                       | <b>VASSILYADI<br/>ET AL [18]</b>                                                                      | <b>KORONES<br/>ET AL [12]</b>                                               |
|----------------------------------|------------------------------|----------------------------------------------------------------------------------------------------------------------------------|-------------------------------------------------------------------------------------------------------------|--------------------------------------------------------------------------------------------------------------------------------------------------------------------------------------|-----------------------------------------------------------------------------------|-------------------------------------------------------------------------------------------------------|-----------------------------------------------------------------------------|
| <b>GROSS TOTAL<br/>RESECTION</b> | No residual<br>tumour        | Absence of<br>enhancing nodular<br>elements determined<br>on the immediate<br>postoperative MR<br>scan defined by<br>radiologist | Lack of nodular<br>enhancement on early<br>postoperative MR<br>imaging (i.e. within 48<br>hours of surgery) | Lack of nodular<br>enhancement on imaging<br>performed in the<br>immediate postoperative<br>period (within 3 days of<br>the surgery) by a neuro-<br>radiologist & 2<br>neurosurgeons | NR                                                                                | NR                                                                                                    | NR                                                                          |
| <b>SUB-TOTAL<br/>RESECTION</b>   | Residual<br>tumour           | N/A                                                                                                                              | N/A                                                                                                         | N/A                                                                                                                                                                                  | NR                                                                                | NR                                                                                                    | NR                                                                          |
| <b>RECURRENCE</b>                | NR                           | NR                                                                                                                               | Development of<br>progressive, nodular<br>enhancement on 2<br>successive follow-up<br>images                | Early nodular<br>enhancement on imaging<br>at 3-6 months                                                                                                                             | NR                                                                                | NR                                                                                                    | Tumor which<br>had<br>completely<br>responded to<br>treatment and<br>regrew |
| <b>PROGRESSION</b>               | NR                           | N/A                                                                                                                              | N/A                                                                                                         | N/A                                                                                                                                                                                  | 25% increase<br>in the maximal<br>cross-sectional<br>area<br>documented<br>on MRI | Residual lesion<br>enlargement in all<br>three dimensions<br>compared to the<br>previous MRI<br>image | Residual<br>tumor which<br>progressed                                       |

**Key: MRI: Magnetic resonance imaging; N/A: not applicable; NR: not reported**

**The utility of routine surveillance screening with magnetic resonance imaging (MRI) to detect tumour recurrence in children with low grade central nervous system (CNS) tumours: a systematic review**

**Journal of Neuro-oncology**

Simon P. Stevens,<sup>1</sup> Caroline Main,<sup>1</sup> Simon Bailey,<sup>2</sup> Barry Pizer,<sup>3</sup> Martin English,<sup>5</sup> Robert Phillips,<sup>6</sup> Andrew Peet,<sup>4</sup> Shivaram Avula,<sup>3</sup> Sophie Wilne,<sup>7</sup> Keith Wheatley,<sup>1</sup> Pamela R. Kearns,<sup>1,5</sup> Jayne S. Wilson<sup>1</sup>

<sup>1</sup> Cancer Research UK Clinical Trials Unit (CRCTU), Institute of Cancer and Genomic Sciences, University of Birmingham, UK

<sup>2</sup> Sir James Spence Institute of Child Health, Royal Victoria Infirmary, Newcastle-Upon-Tyne

<sup>3</sup> Alder Hey Children's NHS Foundation Trust, Liverpool, UK

<sup>4</sup> Institute of Cancer and Genomic Sciences, University of Birmingham, UK

<sup>5</sup> Birmingham Women and Children's Hospital NHS Foundation Trust, Birmingham, UK

<sup>6</sup> Centre for Reviews and Dissemination (CRD), University of York, UK

<sup>7</sup> Queen's Medical Centre, Nottingham University Hospitals' NHS Trust, Nottingham, UK

**Correspondence:**

Jayne Wilson

UK; Tel: +441214149273

Email: j.s.wilson.1@bham.ac.uk
