# Supplementary material for: The utility of routine surveillance screening with magnetic resonance imaging (MRI) to detect tumour recurrence in children with low-grade central nervous system (CNS) tumours: a systematic review
Source: Springer Nature journal article supplement (doi:10.1007/s11060-018-2901-x), 2018-06-09
Supplement: MOESM5 [file 15833800]

## Online Resource 5: Quality appraisal of included primary studies

| Study (year) [ref]                | Study design              | Selection bias                                                 | Detection bias                   |                                                                                       |                                                            |                                                           |                                                                                                                 |
|-----------------------------------|---------------------------|----------------------------------------------------------------|----------------------------------|---------------------------------------------------------------------------------------|------------------------------------------------------------|-----------------------------------------------------------|-----------------------------------------------------------------------------------------------------------------|
|                                   |                           | Is the study sample representative of the relevant population? | Are inclusion criteria explicit? | At study entry were participants at a similar timepoint in their disease progression? | Was follow-up long enough for important outcomes to occur? | Were outcomes assessed using objective criteria/blinding? | If sub-series comparisons are made is there sufficient information on sample distribution & prognostic factors? |
| <b>Low Grade Tumour studies</b>   |                           |                                                                |                                  |                                                                                       |                                                            |                                                           |                                                                                                                 |
| Alford et al (2016) [13]          | Retrospective case series | +                                                              | +                                | +                                                                                     | +                                                          | +                                                         | NA                                                                                                              |
| Dodgshun et al (2016) [14]        | Retrospective case series | +                                                              | +                                | +                                                                                     | NR                                                         | +                                                         | NA                                                                                                              |
| Dorward et al (2010) [15]         | Retrospective case series | +                                                              | +                                | +                                                                                     | +                                                          | +                                                         | NA                                                                                                              |
| Kim et al (2014) [16]             | Retrospective case series | +                                                              | +                                | +                                                                                     | +                                                          | +                                                         | NA                                                                                                              |
| Udaka et al (2013) [17]           | Retrospective case series | +                                                              | +                                | +                                                                                     | +                                                          | +                                                         | +                                                                                                               |
| Vassilyadi et al (2009) [18]      | Retrospective case series | +                                                              | +                                | +                                                                                     | +                                                          | +                                                         | NA                                                                                                              |
| <b>Mixed Grade Tumour studies</b> |                           |                                                                |                                  |                                                                                       |                                                            |                                                           |                                                                                                                 |
| Korones et al (2001) [12]         | Retrospective case series | +                                                              | +                                | +                                                                                     | NR                                                         | +/-                                                       | +                                                                                                               |

**Key:** +: yes; -: no; +/-: Partial; NA: Not applicable; ?: Unclear

### The utility of routine surveillance screening with magnetic resonance imaging (MRI) to detect tumour recurrence in children with low grade central nervous system (CNS) tumours: a systematic review

#### Journal of Neuro-oncology

Simon P. Stevens,<sup>1</sup> Caroline Main,<sup>1</sup> Simon Bailey,<sup>2</sup> Barry Pizer,<sup>3</sup> Martin English,<sup>5</sup> Robert Phillips,<sup>6</sup> Andrew Peet,<sup>4</sup> Shivaram Avula,<sup>3</sup> Sophie Wilne,<sup>7</sup> Keith Wheatley,<sup>1</sup> Pamela R. Kearns,<sup>1,5</sup> Jayne S. Wilson<sup>1</sup>

<sup>1</sup> Cancer Research UK Clinical Trials Unit (CRCTU), Institute of Cancer and Genomic Sciences, University of Birmingham, UK

<sup>2</sup> Sir James Spence Institute of Child Health, Royal Victoria Infirmary, Newcastle-Upon-Tyne

<sup>3</sup> Alder Hey Children's NHS Foundation Trust, Liverpool, UK

<sup>4</sup> Institute of Cancer and Genomic Sciences, University of Birmingham, UK

<sup>5</sup> Birmingham Women and Children's Hospital NHS Foundation Trust, Birmingham, UK

<sup>6</sup> Centre for Reviews and Dissemination (CRD), University of York, UK

<sup>7</sup> Queen's Medical Centre, Nottingham University Hospitals' NHS Trust, Nottingham, UK

#### Correspondence:

Jayne Wilson

UK; Tel: +441214149273

Email: j.s.wilson.1@bham.ac.uk
